# Supplementary material
Source: HighWire-hosted journal article supplement (https://erj.ersjournals.com/content/55/5/1900950)
Supplement: inline-supplementary-material-1 [file inline-supplementary-material-1.pdf]

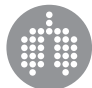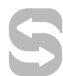

SHAREABLE PDF

AGORA

RESEARCH LETTER

ERJ European Respiratory Journal Eur Respir J 0903-1936/1399-3003 European Respiratory Society 10.1183/13993003.00950-2019 ERJ-00950-2019 AGORA RESEARCH LETTER

Highly efficient genome editing in primary human bronchial epithelial cells differentiated at air-liquid interface. RAPITEANU ET AL. RESEARCH LETTER Efficient genome editing in primary human bronchial epithelial cells

Rapiteanu Radu<sup>1</sup>, Karagyozyova Tina<sup>1</sup>, Zimmermann Natalie<sup>2</sup>, Singh Kuljit<sup>1</sup>, Wayne Gareth<sup>1</sup>, Martufi Matteo<sup>1</sup>, Belyaev Nikolai N.<sup>2</sup>, Hessel Edith M.<sup>2</sup>, Michalovich David<sup>2</sup>, Macarron Ricardo<sup>1</sup>, Rowan Wendy C.<sup>1</sup>, Cairns William J.<sup>1</sup>, Roger Jan<sup>1</sup>, Betts Joanna<sup>1</sup>, Beinke Soren<sup>2</sup>, Maratou Klio<sup>1</sup>,

<sup>1</sup>Target Sciences, GlaxoSmithKline Research and Development, Stevenage, UK. <sup>2</sup>Refractory Respiratory Inflammation DPU, GlaxoSmithKline Research and Development, Stevenage, UK.

**Correspondence:** Radu Rapiteanu, GlaxoSmithKline Research and Development, Functional Genomics, Gunnels Wood Road, Stevenage, SG1 2NY, UK. E-mail: radu.a.rapiteanu@gsk.com 202020205501022019310120202020

#### *To the Editor:*

The structure and composition of the bronchial epithelium is altered in respiratory diseases such as COPD and asthma, in which goblet cell hyperplasia and reduced numbers of ciliated cells impair mucociliary clearance. Current standard of care focuses on alleviating disease symptoms, such as airway obstruction and inflammation, using bronchodilators or steroids, respectively. Whilst these approaches are effective, they do not address the underlying pathogenic processes. An alternative way forward would be to identify and target the dysregulated cellular pathways responsible for impaired bronchial epithelial function. In this study we describe a single-step, highly efficient and easily scalable genome editing pipeline to aid the dissection of the molecular mechanisms underlying primary human bronchial epithelial cell (BEC) differentiation and function at air-liquid interface (ALI).
